# Supplementary material for: Sociodemographic predictors of knowledge, mosquito bite patterns and protective behaviors concerning vector borne disease: The case of dengue fever in Chinese subtropical city, Hong Kong
Source: PLOS journal article supplement (doi:10.1371/journal.pntd.0008993), 2021-01-19
Supplement: S3 (10.1371/journal.pntd.0008993.s003) [file journal.pntd.0008993.s003]

**S2 Table. Associated factors of mosquito bites at home (weighted analysis)**

| Factors                         | No mosquito bites (n=460) | Have mosquito bites (n=105) | p-value <sup>#</sup> | AOR (95% CI)           | p-value <sup>\$</sup> |
|---------------------------------|---------------------------|-----------------------------|----------------------|------------------------|-----------------------|
| Age                             |                           |                             | <0.001               |                        |                       |
| 18-24                           | 48 (10.4%)                | 19 (17.9%)                  |                      | Ref.                   |                       |
| 25-44                           | 138 (30.0%)               | 49 (46.2%)                  |                      | 0.682 (0.349 – 1.332)  | 0.262                 |
| 45-64                           | 177 (38.5%)               | 30 (28.3%)                  |                      | 0.359 (0.170 – 0.757)  | 0.007*                |
| 65 or older                     | 97 (21.1%)                | 8 (7.5%)                    |                      | 0.224 (0.076 – 0.664)  | 0.007*                |
| Gender                          |                           |                             | 0.087                |                        |                       |
| Male                            | 186 (40.4%)               | 33 (31.4%)                  |                      | Ref.                   |                       |
| Female                          | 274 (59.6%)               | 72 (68.6%)                  |                      | 1.779 (1.0770 – 2.936) | 0.024*                |
| Residential district            |                           |                             | 0.844                |                        |                       |
| Hong Kong Island                | 76 (16.6%)                | 16 (15.2%)                  |                      |                        |                       |
| Kowloon                         | 136 (29.6%)               | 34 (32.4%)                  |                      |                        |                       |
| New Territories                 | 247 (53.8%)               | 55 (52.4%)                  |                      |                        |                       |
| Housing                         |                           |                             | 0.754                |                        |                       |
| Public housing                  | 189 (41.3%)               | 38 (36.2%)                  |                      |                        |                       |
| Support housing                 | 68 (14.8%)                | 19 (18.1%)                  |                      |                        |                       |
| Private housing                 | 197 (42.9%)               | 47 (44.8%)                  |                      |                        |                       |
| Temporary housing               | 4 (0.9%)                  | 1 (1.0%)                    |                      |                        |                       |
| Floor Level                     |                           |                             | <0.001               |                        |                       |
| <6                              | 85 (18.6%)                | 37 (35.6%)                  |                      | Ref.                   |                       |
| 6-25                            | 277 (60.7%)               | 57 (54.8%)                  |                      | 0.378 (0.224 – 0.637)  | <0.001*               |
| >25                             | 94 (20.6%)                | 10 (9.6%)                   |                      | 0.219 (0.100 – 0.480)  | <0.001*               |
| Live near water source          |                           |                             | 0.301                |                        |                       |
| No                              | 269 (58.9%)               | 56 (53.3%)                  |                      |                        |                       |
| Yes                             | 188 (41.1%)               | 49 (46.7%)                  |                      |                        |                       |
| Live near bushy and grassy area |                           |                             | 0.019                |                        |                       |
| No                              | 4 (10.0%)                 | 3 (2.9%)                    |                      | Ref.                   |                       |
| Yes                             | 413 (90.0%)               | 102 (97.1%)                 |                      | 4.036 (1.169 – 13.934) | 0.027*                |
| Live near construction site     |                           |                             | 0.405                |                        |                       |
| No                              | 299 (65.9%)               | 64 (61.5%)                  |                      |                        |                       |
| Yes                             | 155 (34.1%)               | 40 (38.5%)                  |                      |                        |                       |
| CSSA (Fisher)                   |                           |                             | 0.050                |                        |                       |
| No                              | 433 (94.5%)               | 102 (99.0%)                 |                      | Ref.                   |                       |
| Yes                             | 25 (5.5%)                 | 1 (1.0%)                    |                      | 0.190 (0.291 – 1.846)  | 0.190                 |
| Education                       |                           |                             | 0.010                |                        |                       |
| primary and below               | 120 (26.1%)               | 13 (12.3%)                  |                      | Ref.                   |                       |
| secondary                       | 199 (43.3%)               | 53 (50.0%)                  |                      | 1.379 (0.613 – 3.103)  | 0.437                 |
| post-secondary                  | 141 (30.7%)               | 40 (37.7%)                  |                      | 1.226 (0.502 – 2.993)  | 0.655                 |
| Chronic disease                 |                           |                             | 0.037                |                        |                       |
| No                              | 344 (75.7%)               | 87 (85.3)                   |                      | Ref.                   |                       |
| Yes                             | 110 (24.2%)               | 15 (14.7%)                  |                      | 0.864 (0.435 – 1.714)  | 0.676                 |
| Regional ovitrap index          | 6.47 (4.97 – 11.05)       | 6.17 (4.97 – 11.05)         | 0.356                |                        |                       |
